# Supplementary material for: A U-Box E3 Ubiquitin Ligase, PUB20, Interacts with the Arabidopsis G-Protein β Subunit, AGB1
Source: PubMed Central journal article supplement (PMC3499536; doi:10.1371/journal.pone.0049207), 2012-11-15
Supplement: pone.0049207.s001.pdf [file pone.0049207.s001.pdf]

```

      10      20      30      40      50      60      70      80
.....|.....|.....|.....|.....|.....|.....|.....|
PUB20  MGLSLRVRRRGGSVSKKEIIPVTSCEEEVEITIPSOQFCPISEYELMKDPVIIASGITDYDRENIEKWFESGYQTCPVNTV
.....|.....|.....|.....|.....|.....|.....|.....|
      90     100     110     120     130     140     150     160
PUB20  LTSLEQIPNHTIRRMIQWCGSSLGGGIERIPTPRVPVTSHQVSEICERLSAATRRGDYAACMEMVTMTRLGKESERNR
.....|.....|.....|.....|.....|.....|.....|.....|
      170     180     190     200     210     220     230     240
PUB20  KCVKENGAGLVLCVCFDAFSENANASLLEETVSVLTWMLPIGLEGQSKLTTTSSFNRLVELLRNGDQNA AFLIKELLEL
.....|.....|.....|.....|.....|.....|.....|.....|
                        ARM repeat domain
      250     260     270     280     290     300     310     320
PUB20  NVTHVHALTKINGVQEA FMK SINRDS TCVNSLIS IHMIL TNQETVSRFLELDLVNITVEMLVDSENSVCEKALTVLNVI
.....|.....|.....|.....|.....|.....|.....|.....|
      330     340     350     360     370     380     390     400
PUB20  CETKEGREKVRNRKLVIPILVKKI LKISEKDLVSMWKVCKSGDGSEVEEALRLGAFKLVVMLQVGC GEGTKEKVT EL
.....|.....|.....|.....|.....|.....|.....|.....|
      410     420     430
PUB20  LKMMNKVMKMGFVDRSYSSSIEFKHVKKPF

```

**Figure S1. The primary sequences of full-length PUB20 protein and PUB20 $\Delta$ ARM protein.** Solid underlines indicate the U-box and ARM repeats identified by Trujillo, Ichimura, Casais and Shirasu (Current Biology 18: 1396-1401, 2008). Dotted underline indicates the region of PUB20 used as PUB20 $\Delta$ ARM (Fig. 1A). Identical and similar residues are shown in black and gray, respectively.
