# Supplementary material for: A U-Box E3 Ubiquitin Ligase, PUB20, Interacts with the Arabidopsis G-Protein β Subunit, AGB1
Source: PubMed Central journal article supplement (PMC3499536; doi:10.1371/journal.pone.0049207), 2012-11-15
Supplement: pone.0049207.s003.pdf [file pone.0049207.s003.pdf]

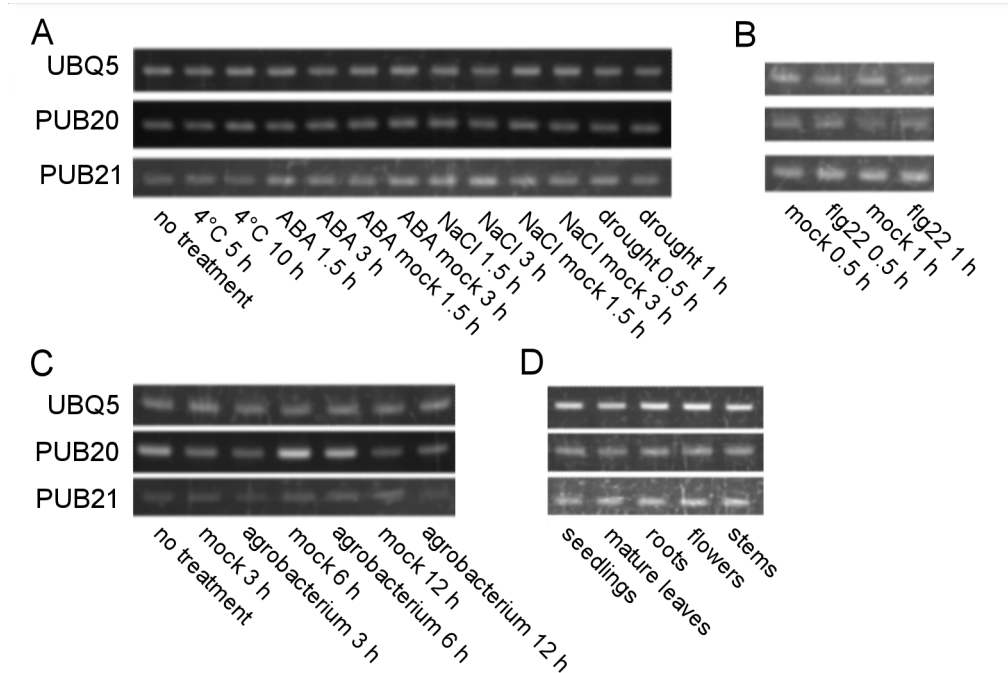

**Figure S3. Expression analysis of PUB20 and PUB21 by semi-quantitative RT-PCR.** (A) Four-week-old plants of *Arabidopsis* (ecotype: Col-0) were subjected to low temperature (4 °C), 100  $\mu$ M ABA, 300 mM NaCl or drought stress treatment before sampling. Drought stress treatment was performed by placing the plants on a filter paper and keeping them in the growth chamber set at 22 °C, and other stress treatments were performed on liquid media. (B) Three-week-old *Arabidopsis* plants were incubated in 20 mM Tris-HCl (pH 6.8) containing 1  $\mu$ M flg22 for indicated times. (C) Three-week-old *Arabidopsis* plants were incubated in the DW containing *Agrobacterium tumefaciens* ( $OD_{600} = 1.0$ ) for one minute and then incubated on 1/2x MS plates for indicated times. (D) 10-d-old (for seedlings) or five to six-week-old (for mature leaves, roots, flowers, stems) *Arabidopsis* plants were sampled. Primer pairs used are listed in Table S2.
