# Supplementary material for: A U-Box E3 Ubiquitin Ligase, PUB20, Interacts with the Arabidopsis G-Protein β Subunit, AGB1
Source: PubMed Central journal article supplement (PMC3499536; doi:10.1371/journal.pone.0049207), 2012-11-15
Supplement: pone.0049207.s005.pdf [file pone.0049207.s005.pdf]

**Table S1. Primers used for making constructs in this work.**

|                                                   | Primer sequences                             | Names of constructs         |
|---------------------------------------------------|----------------------------------------------|-----------------------------|
| PUB20 <i>Xba</i> I FW                             | CCGTCTAGAATGGGACTTTCATTGAGAGT                | pBS-35S:PUB20-VC80          |
| PUB20 <i>Sal</i> I stop<br><i>Sac</i> I RV        | CGGAGCTCAGCGTCGACAAAATGGTTTCTTAAC<br>ATG     | pBS-35S:PUB20-VC80          |
| PUB20 <i>Eco</i> RI<br><i>Xba</i> I FW            | CCGAATTCTCTAGAATGGGACTTTCATTGAGAG<br>T       | pGAD-PUB20 $\Delta$ ARM     |
| PUB20 $\Delta$ ARM<br><i>Sa</i> I <i>Xho</i> I RV | GGGCTCGAGCCGTCGACTCACGGGTACACGAG<br>GCGTCGGG | pGAD-PUB20 $\Delta$ ARM     |
| PUB21 promoter<br>5' <i>Hind</i> III FW           | CCGAAGCTTCCATGTCATAATGTATTCGAG               | pBI121-PUB21pro: <i>GUS</i> |
| PUB21 promoter<br>3' <i>Kpn</i> I RV              | CCGGTACCGTTTTGTAAAATGCAAAAATAG               | pBI121-PUB21pro: <i>GUS</i> |
| PUB20 <i>Sal</i> I FW                             | CCGGTCGACATGGGACTTTCATTGAGAGT                | pET-32b(+)-PUB20            |
| PUB20 <i>Xho</i> I RV                             | CCGCTCGAGTTAAAATGGTTTCTTAACAT                | pET-32b(+)-PUB20            |
| AGB1 BiFC 5'<br><i>Kpn</i> I FW                   | CCGGTACCGGAATGTCTGTCTCCGAGC                  | pBS-35S:AGB1-VN154          |
| AGB1 BiFC 3'<br><i>Spe</i> I RV                   | CCACTAGTAATCACTCTCCTGGTCCTCC                 | pBS-35S:AGB1-VN154          |
| AGB1 Y2H 5'<br><i>Eco</i> RI FW                   | CCGGAATTCATGTCTGTCTCCGAGCTCAA                | pGBKT7-AGB1                 |
| AGB1 Y2H 3'<br><i>Bam</i> HI RV                   | CCGGGATCCTCAAATCACTCTCCTGTGTC                | pGBKT7-AGB1                 |
| AGG1 BiFC 5'<br><i>Kpn</i> I FW                   | GGGGTACCATGCGAGAGGAAACTGTGG                  | pBS-35S:AGG1-VC80           |
| AGG1 BiFC 3'<br><i>Spe</i> I RV                   | CCACTAGTAAGTATTAAGCATCTGCAGCC                | pBS-35S:AGG1-VC80           |
