# Supplementary material for: A U-Box E3 Ubiquitin Ligase, PUB20, Interacts with the Arabidopsis G-Protein β Subunit, AGB1
Source: PubMed Central journal article supplement (PMC3499536; doi:10.1371/journal.pone.0049207), 2012-11-15
Supplement: pone.0049207.s006.pdf [file pone.0049207.s006.pdf]

**Table S2. Primers used in RT-PCR analysis.**

|           | Primer sequences       |
|-----------|------------------------|
| PUB20 FW1 | CGGGGATCACTTACGATCGCGA |
| PUB20 RV1 | GTGACGACCCGCACCAACCT   |
| PUB21 FW  | TCCGACGCCACGTGTCCCTT   |
| PUB21 RV  | TCTCGTAATCCCCACGCCGC   |
