# Supplementary material for: A U-Box E3 Ubiquitin Ligase, PUB20, Interacts with the Arabidopsis G-Protein β Subunit, AGB1
Source: PubMed Central journal article supplement (PMC3499536; doi:10.1371/journal.pone.0049207), 2012-11-15
Supplement: pone.0049207.s007.pdf [file pone.0049207.s007.pdf]

**Table S3. Primers used in genotyping and RT-PCR analysis of the *pub20* mutant (Figure S4B, C).**

|           | <b>Primer sequences</b> |
|-----------|-------------------------|
| PUB20 FW2 | GTGACCAGTCATCAAGTCTCCG  |
| PUB20 RV2 | GCAAACGCTGTTTTCTGAATC   |
