# Supplementary material for: A U-Box E3 Ubiquitin Ligase, PUB20, Interacts with the Arabidopsis G-Protein β Subunit, AGB1
Source: PubMed Central journal article supplement (PMC3499536; doi:10.1371/journal.pone.0049207), 2012-11-15
Supplement: pone.0049207.s008.pdf [file pone.0049207.s008.pdf]

**Table S4. Effects of plant hormones on germination rate.**

| Treatment              | Effect on germination rate <sup>1</sup> |              |    | Reference |
|------------------------|-----------------------------------------|--------------|----|-----------|
|                        | <i>agb1</i>                             | <i>pub20</i> | WT |           |
| 1 $\mu$ M ABA          | --                                      | -            | -  | 8         |
| 10 ppb brassinolide    | 0                                       | +            | +  | 3         |
| 100 mM NaCl            |                                         | -            | -  |           |
| 1 $\mu$ M flg22        |                                         | 0            | 0  |           |
| 5 $\mu$ M brassinazole |                                         | -            | -  |           |

<sup>1</sup>0, little effect; +, promoted; -, retarded; --, strongly retarded
